# Supplementary material for: Association between stopping renin-angiotensin system inhibitors immediately before hemodialysis initiation and subsequent cardiovascular events
Source: Springer Nature journal article supplement (doi:10.1038/s41440-024-01616-8), 2024-03-04
Supplement: MOESM1 [file 41440_2024_1616_MOESM1_ESM.pdf]

## **Supplementary Material for:**

**Association between stopping renin-angiotensin system inhibitors  
immediately before hemodialysis initiation and subsequent  
cardiovascular events**

## **Table of Contents:**

|                                                                                                                                                                |          |
|----------------------------------------------------------------------------------------------------------------------------------------------------------------|----------|
| <b>Supplementary Table 1. Baseline characteristics based on the patterns of RASIs<br/>use 3 months before and at the time of hemodialysis initiation .....</b> | <b>2</b> |
| <b>Supplementary Table 2. Number and percentage of missing data in patients for<br/>survival analysis.....</b>                                                 | <b>3</b> |

**Supplementary Table 1. Baseline characteristics based on the patterns of RASIs use 3 months before and at the time of hemodialysis initiation**

|                                                                      | Total<br>N = 1,118 | Continuing<br>n = 650 | Stopping<br>n = 67 | None-using<br>n = 311 | Starting<br>n = 47 | Unknown<br>n = 43 |
|----------------------------------------------------------------------|--------------------|-----------------------|--------------------|-----------------------|--------------------|-------------------|
| <b>Clinical parameters</b>                                           |                    |                       |                    |                       |                    |                   |
| Age, years                                                           | 68 ± 13            | 67 ± 13               | 68 ± 14            | 71 ± 12               | 65 ± 13            | 69 ± 9            |
| Male sex                                                             | 764 (68%)          | 441 (68%)             | 44 (66%)           | 211 (68%)             | 36 (77%)           | 32 (74%)          |
| Body mass index, kg/m <sup>2</sup>                                   | 23.7 ± 4.3         | 24.1 ± 4.2            | 24.7 ± 5.0         | 22.6 ± 4.3            | 23.4 ± 4.6         | 23.6 ± 3.4        |
| Underlying disease                                                   |                    |                       |                    |                       |                    |                   |
| Diabetic kidney disease                                              | 524 (47%)          | 333 (51%)             | 33 (49%)           | 122 (39%)             | 19 (40%)           | 17 (40%)          |
| Glomerulonephritis                                                   | 159 (14%)          | 111 (17%)             | 5 (7.5%)           | 32 (10%)              | 4 (8.5%)           | 7 (16%)           |
| Nephrosclerosis                                                      | 287 (26%)          | 138 (21%)             | 21 (31%)           | 101 (32%)             | 15 (32%)           | 12 (28%)          |
| Polycystic kidney disease                                            | 40 (3.6%)          | 27 (4.2%)             | 0 (0%)             | 9 (2.9%)              | 2 (4.3%)           | 2 (4.7%)          |
| Others                                                               | 66 (5.9%)          | 26 (4.0%)             | 2 (3.0%)           | 31 (10%)              | 4 (8.5%)           | 3 (7.0%)          |
| Unknown                                                              | 42 (3.8%)          | 15 (2.3%)             | 6 (9.0%)           | 16 (5.1%)             | 3 (6.4%)           | 2 (4.7%)          |
| Diabetes mellitus                                                    | 606 (54%)          | 371 (57%)             | 36 (54%)           | 148 (48%)             | 27 (57%)           | 24 (56%)          |
| History of cardiovascular disease                                    | 515 (46%)          | 289 (45%)             | 25 (37%)           | 156 (50%)             | 24 (51%)           | 21 (49%)          |
| Charlson comorbidity index                                           | 5 (3–6)            | 5 (3–6)               | 5 (4–6)            | 5 (4–6)               | 5 (4–6)            | 4 (3–5)           |
| Duration of nephrology care, years                                   | 2.1 (1.0–4.3)      | 2.3 (1.1–4.3)         | 1.5 (0.8–3.3)      | 1.9 (0.9–4.4)         | 1.6 (0.8–4.0)      | 2.6 (1.1–5.7)     |
| Smoking history                                                      | 364 (57%)          | 193 (54%)             | 18 (44%)           | 119 (62%)             | 19 (66%)           | 15 (62%)          |
| Urgent dialysis                                                      | 273 (25%)          | 142 (22%)             | 22 (33%)           | 86 (28%)              | 14 (30%)           | 9 (21%)           |
| Vascular access                                                      |                    |                       |                    |                       |                    |                   |
| Arteriovenous fistula                                                | 883 (79%)          | 533 (82%)             | 48 (72%)           | 229 (74%)             | 39 (83%)           | 34 (79%)          |
| Arteriovenous graft                                                  | 80 (7.2%)          | 45 (7.0%)             | 9 (13%)            | 21 (6.8%)             | 1 (2.1%)           | 4 (9.3%)          |
| Temporary catheter                                                   | 149 (13%)          | 69 (11%)              | 10 (15%)           | 58 (19%)              | 7 (15%)            | 5 (12%)           |
| Systolic blood pressure, mmHg                                        | 153 ± 26           | 154 ± 25              | 149 ± 28           | 151 ± 26              | 156 ± 22           | 151 ± 27          |
| Diastolic blood pressure, mmHg                                       | 77 ± 14            | 77 ± 14               | 78 ± 15            | 77 ± 15               | 82 ± 14            | 77 ± 16           |
| <b>Laboratory measurements</b>                                       |                    |                       |                    |                       |                    |                   |
| eGFR 3 months before dialysis initiation, mL/min/1.73 m <sup>2</sup> | 8.2 ± 3.4          | 7.9 ± 3.1             | 9.7 ± 4.0          | 8.5 ± 3.9             | 8.4 ± 2.7          | 7.8 ± 2.3         |
| eGFR at dialysis initiation, mL/min/1.73 m <sup>2</sup>              | 5.3 ± 1.9          | 5.2 ± 1.8             | 5.7 ± 1.9          | 5.5 ± 2.0             | 5.5 ± 1.6          | 4.9 ± 1.4         |
| eGFR decline <sup>a</sup> , mL/min/1.73 m <sup>2</sup>               | 2.8 ± 2.8          | 2.6 ± 2.6             | 4.0 ± 3.3          | 3.0 ± 3.1             | 2.9 ± 2.7          | 2.6 ± 2.0         |
| Hemoglobin, g/dL                                                     | 9.4 ± 1.4          | 9.4 ± 1.4             | 9.6 ± 1.5          | 9.4 ± 1.4             | 10.0 ± 1.4         | 9.0 ± 1.6         |
| Albumin, g/dL                                                        | 3.2 ± 0.6          | 3.2 ± 0.6             | 3.1 ± 0.6          | 3.2 ± 0.6             | 3.4 ± 0.5          | 3.4 ± 0.6         |
| Urea nitrogen, mg/dL                                                 | 91.7 ± 28.1        | 91.2 ± 27.5           | 87.0 ± 29.5        | 93.7 ± 30.0           | 89.3 ± 25.5        | 95.8 ± 23.5       |
| Creatinine, mg/dL                                                    | 8.9 ± 2.9          | 9.1 ± 3.0             | 8.3 ± 2.5          | 8.6 ± 2.7             | 9.0 ± 3.4          | 9.4 ± 2.3         |
| Uric acid, mg/dL                                                     | 8.6 ± 2.3          | 8.5 ± 2.2             | 9.0 ± 2.9          | 8.7 ± 2.5             | 9.4 ± 2.0          | 8.2 ± 1.9         |
| Potassium, mEq/L                                                     | 4.5 ± 0.8          | 4.6 ± 0.8             | 4.4 ± 0.9          | 4.4 ± 0.8             | 4.3 ± 0.5          | 4.7 ± 0.7         |
| Corrected calcium, mg/dL                                             | 8.6 ± 1.0          | 8.6 ± 1.1             | 8.8 ± 1.0          | 8.6 ± 1.0             | 8.9 ± 0.8          | 8.7 ± 0.9         |
| Phosphorus, mg/dL                                                    | 6.3 ± 1.7          | 6.3 ± 1.7             | 6.2 ± 2.0          | 6.2 ± 1.7             | 6.1 ± 1.9          | 6.0 ± 1.6         |
| Intact parathyroid hormone, pg/mL                                    | 300 (191–437)      | 316 (200–446)         | 263 (192–434)      | 285 (184–410)         | 250 (149–399)      | 293 (188–559)     |
| C-reactive protein, mg/dL                                            | 0.24 (0.10–1.24)   | 0.20 (0.09–1.01)      | 0.55 (0.17–2.29)   | 0.35 (0.10–1.48)      | 0.20 (0.03–0.63)   | 0.34 (0.20–0.94)  |
| Low-density lipoprotein cholesterol, mg/dL                           | 88 ± 33            | 87 ± 32               | 94 ± 33            | 90 ± 35               | 95 ± 39            | 84 ± 34           |
| Bicarbonate, mmol/L                                                  | 19.9 ± 4.6         | 19.8 ± 4.4            | 19.4 ± 4.9         | 19.9 ± 5.0            | 21.4 ± 4.6         | 20.0 ± 4.7        |
| <b>Medications</b>                                                   |                    |                       |                    |                       |                    |                   |
| ACEIs 3 months before dialysis initiation                            | 97 (9.0%)          | 82 (13%)              | 14 (21%)           | 0 (0%)                | 0 (0%)             | 1 (50%)           |
| ARBs 3 months before dialysis initiation                             | 682 (63%)          | 624 (96%)             | 57 (85%)           | 0 (0%)                | 0 (0%)             | 1 (33%)           |
| ACEIs                                                                | 104 (9.3%)         | 84 (13%)              | 0 (0%)             | 0 (0%)                | 13 (28%)           | 7 (16%)           |
| ARBs                                                                 | 690 (62%)          | 625 (96%)             | 0 (0%)             | 0 (0%)                | 35 (74%)           | 30 (73%)          |
| β-blockers                                                           | 412 (37%)          | 241 (37%)             | 23 (34%)           | 109 (35%)             | 20 (43%)           | 19 (44%)          |
| Calcium channel blockers                                             | 918 (82%)          | 574 (88%)             | 51 (76%)           | 227 (73%)             | 31 (66%)           | 35 (81%)          |
| Direct renin inhibitors                                              | 46 (4.1%)          | 26 (4.0%)             | 0 (0%)             | 13 (4.2%)             | 2 (4.3%)           | 5 (12%)           |
| Diuretics                                                            | 837 (75%)          | 492 (76%)             | 51 (76%)           | 232 (75%)             | 25 (53%)           | 37 (86%)          |
| Spironolactone                                                       | 60 (5.4%)          | 30 (4.6%)             | 6 (9.0%)           | 21 (6.8%)             | 3 (6.4%)           | 0 (0%)            |
| Ion exchange resins                                                  | 361 (36%)          | 232 (37%)             | 24 (39%)           | 96 (34%)              | 8 (18%)            | 1 (25%)           |
| Sodium bicarbonate                                                   | 547 (49%)          | 334 (51%)             | 34 (51%)           | 141 (45%)             | 16 (34%)           | 22 (51%)          |
| Active vitamin D drugs                                               | 318 (28%)          | 185 (28%)             | 16 (24%)           | 90 (29%)              | 12 (26%)           | 15 (35%)          |
| Phosphate binders                                                    | 420 (38%)          | 248 (38%)             | 25 (37%)           | 119 (38%)             | 11 (23%)           | 17 (40%)          |
| Antiplatelet drugs                                                   | 370 (33%)          | 220 (34%)             | 18 (27%)           | 100 (32%)             | 17 (36%)           | 15 (35%)          |
| Statins                                                              | 485 (43%)          | 290 (45%)             | 25 (37%)           | 129 (41%)             | 17 (36%)           | 24 (56%)          |

Values are expressed as mean ± SD or median (interquartile range) for continuous measures, and number (percent) for categorical measures.

<sup>a</sup>eGFR decline indicates the change in eGFR for 3 months before dialysis initiation.

RASIs, renin-angiotensin system inhibitors; eGFR, estimated glomerular filtration rate; ACEIs, angiotensin converting enzyme inhibitors; ARBs, angiotensin II receptor blockers.

**Supplementary Table 2. Number and percentage of missing data in patients for survival analysis (n = 717)**

| Variables                         | n (%)     |
|-----------------------------------|-----------|
| Age                               | 0 (0%)    |
| Sex                               | 0 (0%)    |
| Body mass index                   | 9 (1.3%)  |
| Diabetes mellitus                 | 0 (0%)    |
| History of cardiovascular disease | 2 (0.3%)  |
| Creatinine                        | 0 (0%)    |
| Potassium                         | 0 (0%)    |
| eGFR decline <sup>a</sup>         | 22 (3.1%) |
| Ion exchange resins use           | 36 (5.0%) |
| Antiplatelet drugs use            | 0 (0%)    |
| β-blockers use                    | 0 (0%)    |
| Diuretics use                     | 0 (0%)    |
| Urgent dialysis                   | 3 (0.4%)  |

<sup>a</sup> eGFR decline indicates the change in eGFR for 3 months before dialysis initiation.

eGFR, estimated glomerular filtration rate.
